# Supplementary material for: ECOMAN: an open-source package for geodynamic and seismological modeling of mechanical anisotropy
Source: Copernicus journal article supplement (doi:10.5194/egusphere-2024-299), 2024-02-12
Supplement: Supplementary file [file egusphere-2024-299-AC2-supplement.pdf]

## General Comments

This paper presents a suit of tools related to the forward and inverse modelling of mechanical anisotropy. The capabilities which these tools provide are in my opinion a very important contribution to scientific progress within the scope of this journal. The paper described the purpose of the individual tools and explains at a high level what kind of changes level changes which were made (in case of being build on previous work), some considerations on how to use it and shows example explanations.

Unfortunately, there are, in my opinion, two major sections missing in this paper. The first sections is a proper methods section, which describes for each tool how it works. For example, what are the equations which are being solved. If it is based on previous work (such as D-REX), what changes have been made to the methods (more detailed then the current description) and how does this align with the assumptions made in the original code. What values of different parameters are used for computing for example wadsleyite or bridgmanite (both in D-REX and in the computation of the elastic tensor).

*D-REX\_M and D-REX\_S are built upon the original D-REX code, which has been extensively described by Kaminski and Ribe, 2001, and Kaminski et al., 2004. Thus, we think it is not necessary to report them here. The existing strategy for computing the LPO evolution of Olivine and Pyroxene crystals has been similarly applied to Wadsleyite, Bridgmanite and post-Perovskite using the corresponding slip systems as listed in Table A1. For each of these new phases it is possible to define in the D-REX\_M and D-REX\_S input file the same free parameters of the D-REX model ( $M^*$ ,  $\lambda^*$ ,  $\chi^*$ , together with in addition the power-law exponent) as for upper mantle aggregates. This is now better clarified in section 2.1.*

*Nevertheless, we agree with the reviewer that the further developments included in the D-REX model should be better explained, and accordingly in the new version of the article we now include:*

- *Appendix A, where we test the numerical solution of the employed D-REX model against the analytical solution derived by Fraters and Billen (2021), and report the available slip systems for the different anisotropic phases in Table A1.*
- *Appendix B, where we describe how the elastic tensors are computed as a function of the local P-T conditions, crystal orientation and volume fraction, modal abundance and aggregate composition. In this section we also include Table B1 with the composition of the 5 mafic and ultramafic lithologies for which lookup tables of  $V_p$ ,  $V_s$  and density have been computed with MMa EoS, and Table B2 with available the single crystal elastic moduli and their P-T derivatives.*
- *Appendix C, where we explain how the velocity gradient is computed in Cartesian coordinate system when the grid is in polar coordinates*
- *Appendix D, where it is explained how the fluid body rotation is applied when the deformation is accommodated by mechanisms other than dislocation creep.*
- *new Figure 2, where we show the P-T distribution of crystal aggregates in a pyrolytic mantle*

- *new Figure 4, where we show sensitivity tests of olivine fabrics and demonstrated that with a suitable choice of the D-REX parameters it is possible to produce either weak or strong olivine fabrics as observed in natural and experimental samples.*

A second section which is missing is a benchmark section, to show that what is stated in the methods section actually works as intended. These should be at least a small suite of simple tests. For example computing the CPO in a simple shear environment, which can be matched against analytic results, the results of other codes and/or experiments. The only benchmarks which are shown are performance benchmarks.

*As explained above, we now include results from a simple benchmark test in Appendix A and several sensitivity tests of the olivine fabric evolution in simple shear reported in Figure 4. It is important to note that the cookbooks included in ECOMAN and partly shown in Figs. 6-9 were effectively designed to function as benchmarks for complex tests. This is why we have not shown simpler benchmarks, but indeed this comment has proven to be quite constructive as it gave us the possibility to demonstrate the ability of the D-REX model to reproduce high-strain olivine fabrics.*

Because these two sections are missing it is not possible to properly review the paper, since the authors do not show what they have done exactly and that they have done it correctly. Although the code is open-source, and it could in theory be checked by looking into the code and creating and running benchmarks yourself, I do think this should be part of the paper.

*We hope that the added material and clarifications will help in better evaluating the article.*

### **Specific comments**

- The geodynamics code which are used for the examples should be mentioned. Looking at the references, it seems like for some of them I3MG is used, but this is not explicitly mentioned and it is not clear for all of them.

*The flow fields in the 2D examples are from analytical solutions, and MATLAB scripts are included in ECOMAN. The code used for the 3D examples in Cartesian coordinates is I3MG, which has been modified to account for spherical grids as described in Faccenda and VanderBeek, 2023. This is now clarified in the captions of Figs. 6-10.*

- Github is not a software archive, since it can easily be removed or changed. It is good to mention it, but you will also need a doi of for the software. You can get this for example from Zenodo.

*Thanks for the suggestion, we have created DOIs which are now indicated in the code availability section.*

- The repository has a license (MIT), a changlog document, a proper versioning scheme and a comprehensive user manual. I assume that this paper is about version 2.0, but this should be explicitly stated in the paper. I could not find any tests or benchmarks in the repository, although it could be that the cookbooks function as tests.

*In the code availability section, it is now stated that the version of ECOMAN described in this article is 2.0. As stated above, the cookbooks function as tests and benchmarks.*

## **Technical corrections**

line 135-137: Name and cite studies which are used together with the lookup tables. Also, it just states that the fabric selection is P-T dependent, so no water dependence? To come back to the general point, it needs to be explained how these fabrics are selected. A graph or table would be nice, if feasible.

*In the Appendix we now include new Tables A1, B1 and B2 about the available slip systems, the composition used in MMA-EoS for the lookup tables, and single crystal elastic tensors and their P-T derivatives, including all the source studies. The depth/density crossovers defining major phase transitions and the parametrized phase boundary for  $P_v - pP_v$  are indicated at the beginning of section 2.1.*

*At present we have not included an Olivine fabric phase diagram as in Fraters and Billen 2021. This is planned in future release of the software, as we state in section 3.2.*

line 361-362: Workstation is a vague term, mention CPU and ram needed to do that that calculation in the stated time.

*These details are now indicated.*

line 428: I assume that the authors mean spreading memory load over several nodes, not CPU's.

*Corrected*

*Thanks for the valuable feedback*

*Manuele Faccenda, on behalf of all co-authors*
